# Supplementary material for: Fossilized Biophotonic Nanostructures Reveal the Original Colors of 47-Million-Year-Old Moths
Source: PubMed Central journal article supplement (PMC3217029; doi:10.1371/journal.pbio.1001200), 2011-11-15
Supplement: pbio.1001200.s006.pdf [file pbio.1001200.s006.pdf]

| <i>prefix</i> | <i>catalogue number</i> |
|---------------|-------------------------|
| Mel           | 296                     |
| Mel           | 641                     |
| Mel           | 650                     |
| Mel           | 3046                    |
| Mel           | 3552                    |
| Mel           | 5944                    |
| Mel           | 10179                   |
| Mel           | 11792                   |
| Mel           | 11808                   |
| Mel           | 11851                   |
| Mel           | 12046                   |
| Mel           | 12113                   |
| Mel           | 12215                   |
| Mel           | 12228                   |
| Mel           | 12269                   |
| Mel           | 12311                   |
| Mel           | 12328                   |
| Mel           | 12460                   |
| Mel           | 12474                   |
| Mel           | 13556                   |
| Mel           | 14034                   |
| Mel           | 14093                   |
| Mel           | 14145                   |
| Mel           | 14199                   |
| Mel           | 14201                   |
| Mel           | 14253                   |
| Mel           | 14293                   |
| Mel           | 14488                   |
| Mel           | 14496                   |
| Mel           | 14553                   |

**Table S1: List of specimens studied.** All specimens are held by the Senckenberg Forschungsinstitut und Naturmuseum, Forschungsstation Grube Messel.
