# Supplementary material for: Fossilized Biophotonic Nanostructures Reveal the Original Colors of 47-Million-Year-Old Moths
Source: PubMed Central journal article supplement (PMC3217029; doi:10.1371/journal.pbio.1001200), 2011-11-15
Supplement: pbio.1001200.s007.pdf [file pbio.1001200.s007.pdf]

**Table S2: Ultrastructural details of scales exhibiting different colours and (in the case of intact individuals) from different parts of the forewing**

| <i>Specimen</i> | <i>Type of specimen</i> | <i>Location of sample</i> | <i>Scale colour in glycerine</i> | <i>Scale thickness (um)</i> | <i>Ridge spacing (um)</i> | <i>Cross rib spacing (nm)</i> | <i>Microrib spacing (nm)</i> | <i>Ridge lamella length (um)</i> | <i>Ridge lamella overlap</i> | <i>No. of laminae in lumen</i> |
|-----------------|-------------------------|---------------------------|----------------------------------|-----------------------------|---------------------------|-------------------------------|------------------------------|----------------------------------|------------------------------|--------------------------------|
| 14861           | intact individual       | basal/discal              | yellow                           | 1.48                        | 1.9-2.5                   | 600                           | 138-150                      | 1.35                             | 2                            | 4-8                            |
| 14861           | intact individual       | basal/discal              | yellow-orange                    | 1.27                        | 1.8-2.6                   | 550-610                       | 175                          | 2.9-3.1                          | 2-3                          | 6                              |
| 14861           | intact individual       | postdiscal                | green                            | -                           | 2.6                       | -                             | 122                          | -                                | -                            | ≤ 5                            |
| 14861           | intact individual       | submarginal               | blue                             | 0.16 - 0.87                 | 2.07-2.82                 | 580                           | 176                          | 2.1                              | 2-3                          | 4                              |
| 14861           | intact individual       | wing margin               | brown                            | 0.25                        | -                         | -                             | -                            | -                                | -                            | -                              |
| 11808           | coprolite               | -                         | yellow                           | 1.2                         | 2.6                       | 540                           | 133-188                      | 1.18                             | 3-4                          | ≤ 7                            |
| 11808           | coprolite               | -                         | blue                             | 1.25                        | 1.9-2.2                   | 530                           | 172                          | 2.9-3.2                          | 3-4                          | ≤ 7                            |

Perforation factor: abbreviations refer to position on the scale as follows: d, distal; m, medial; p, proximal.

| <i>perforation factor</i> | <i>Details of laminae in scale lumen</i> |                                  |                             |                             |                             |                             |                            |                               | <i>Lamina thickness (nm)</i> |          |          |          |          |          |          |          |
|---------------------------|------------------------------------------|----------------------------------|-----------------------------|-----------------------------|-----------------------------|-----------------------------|----------------------------|-------------------------------|------------------------------|----------|----------|----------|----------|----------|----------|----------|
|                           | <i>1: microribs+cr ossribs</i>           | <i>2: large rod-like spacers</i> | <i>3: bead-like spacers</i> | <i>4: bead-like spacers</i> | <i>5: bead-like spacers</i> | <i>6: bead-like spacers</i> | <i>7: trabecular layer</i> | <i>8: granular base layer</i> | <i>1</i>                     | <i>2</i> | <i>3</i> | <i>4</i> | <i>5</i> | <i>6</i> | <i>7</i> | <i>8</i> |
| 0.05(p)-0.32(d)           | y                                        | y                                | y                           | y                           | y                           | y                           | y                          | y                             | 40                           | 124      | 110      | 87       | 72       | 66       | 59       | -        |
| 0.05(p)-0.3(d)            | y                                        | y                                | y                           | y                           | y                           | n                           | y                          | y                             | -                            | 98       | 89       | 81       | 77       | 63       | 55       | 47       |
| -                         | y                                        | y                                | y                           | y                           | -                           | -                           | -                          | -                             | -                            | -        | -        | -        | -        | -        | -        | -        |
| 0.15(p)                   | y                                        | y                                | y                           | n                           | n                           | n                           | y                          | y                             | 31                           | 111      | 79       | -        | -        | -        | 63       | 31       |
| -                         | y                                        | y                                | y                           | n                           | n                           | n                           | n                          | y                             | 15                           | 111      | 45       | -        | -        | -        | -        | 42       |
| 0.2(m)-0.32(d)            | y                                        | y                                | y                           | y                           | y                           | y                           | y                          | y                             | 111                          | 93       | 74       | 67       | 60       | 53       | -        | 35       |
| 0.25 (d)                  | y                                        | y                                | y                           | y                           | y                           | y                           | y                          | -                             | 31                           | 111      | 87       | 63       | 55       | 47       | -        | -        |
